# Supplementary material
Source: PubMed Central journal article supplement (PMC5067756)
Supplement: IAI.00532-16_zii999091869so1.pdf [file IAI.00532-16_zii999091869so1.pdf]

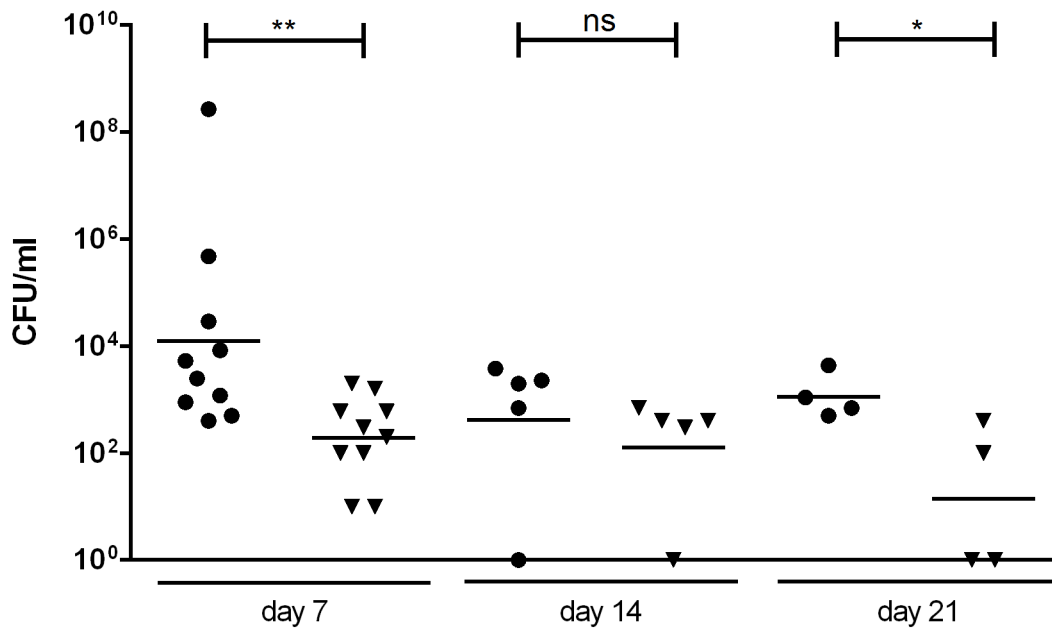

**Supplemental Figure S1.** Bacterial gallbladder CFU enumeration of *Salmonella* at 7 days, 14 days, and 21 days post-infection in the presence of gallstones. Mice were given intraperitoneal injections of WT (circles) or WT+ViAg (triangles). In both cases, the resulting final dose was 10<sup>4</sup> and the limit of detection was 100 CFU/ml. An unpaired t-test with Welch's correction was used to determine significant differences between mutant strains and WT in each organ (\*,  $P < 0.05$ ; \*\*,  $P < 0.01$ ). Bars indicate means.

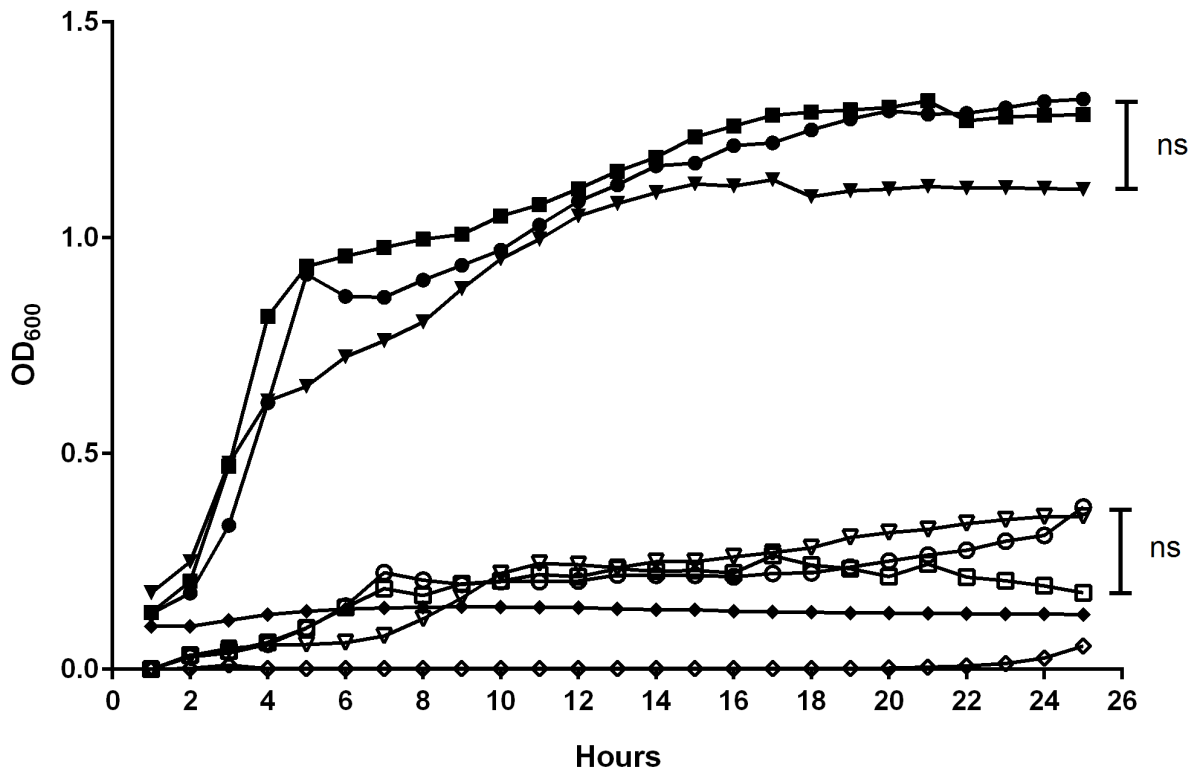

**Supplemental Figure S2.** Growth curve of WT (circles), WT + Vi-antigen (upside down triangles), and  $\Delta wcaM\Delta csgA\Delta yihO\Delta bcsE$  (squares), in both rich TSB media (solid) and minimal M9 media (open). A control of the media only (M9, open diamonds; TSB, closed diamonds) was performed to verify media sterility. An unpaired t-test was used to determine significant differences between the mutant strain and WT (ns = not significant).

## Supplemental Methods

### Growth Curves

Microtiter wells were inoculated with a 1:100 dilution of  $2 \times 10^9$  bacteria in TSB or M9 and incubated for 24 hr at 37°C shaking every 5 sec. Optical density was measured every hour at 600 nm (OD<sub>600</sub>) in a SpectraMax Spectrophotometer with SoftMax Pro software (Molecular Devices) to determine the rate of growth.
